# Supplementary figures and images for: TRIM21 drives stress-induced neuroinflammation and behavioral deficits via gasdermin D- dependent IL-1β release in a rat model of repeated social defeat
Source: Research Square preprint supplement (doi:10.21203/rs.3.rs-8260120/v1), 2025-12-12

**Supplementary File Original blots**


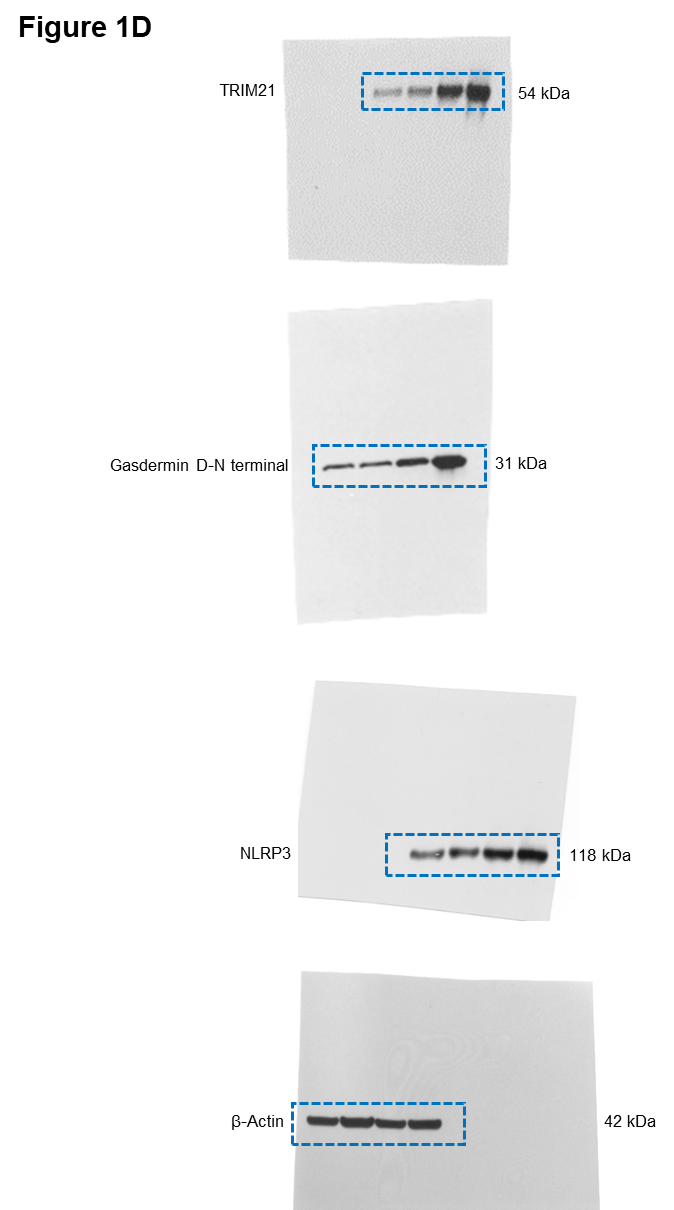


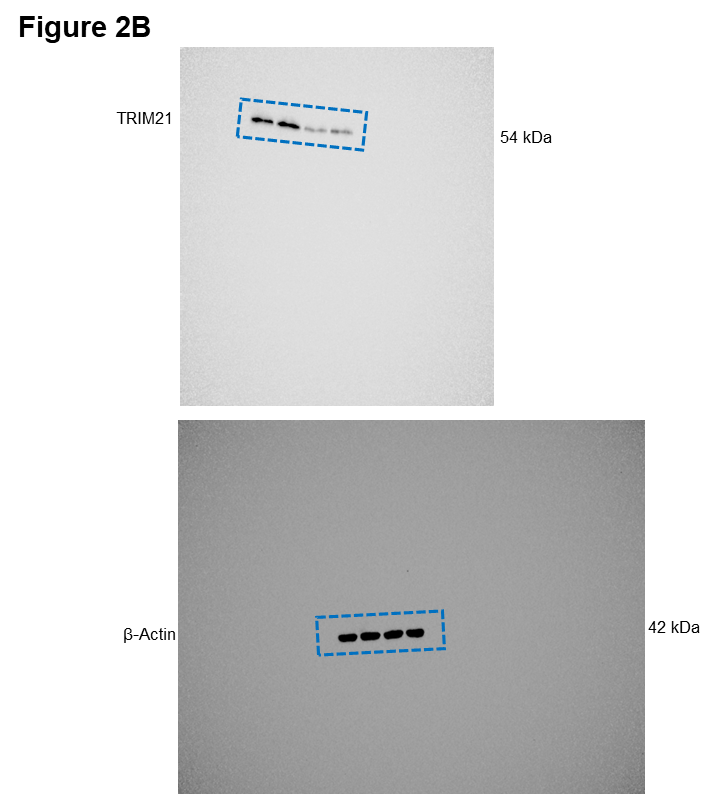


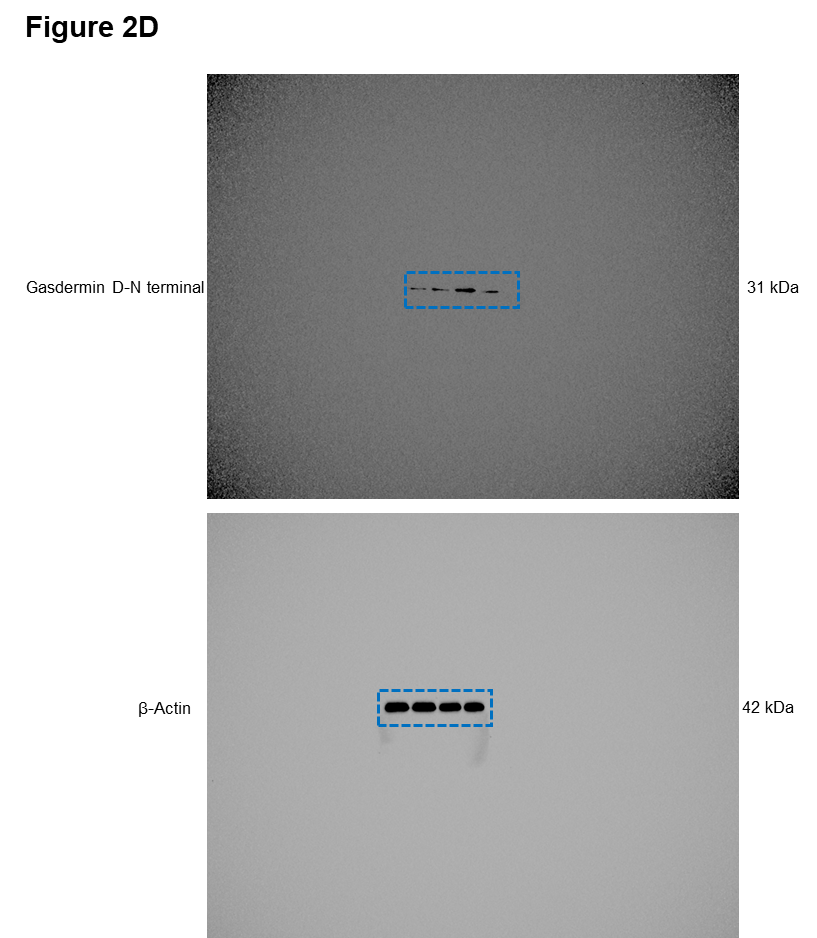


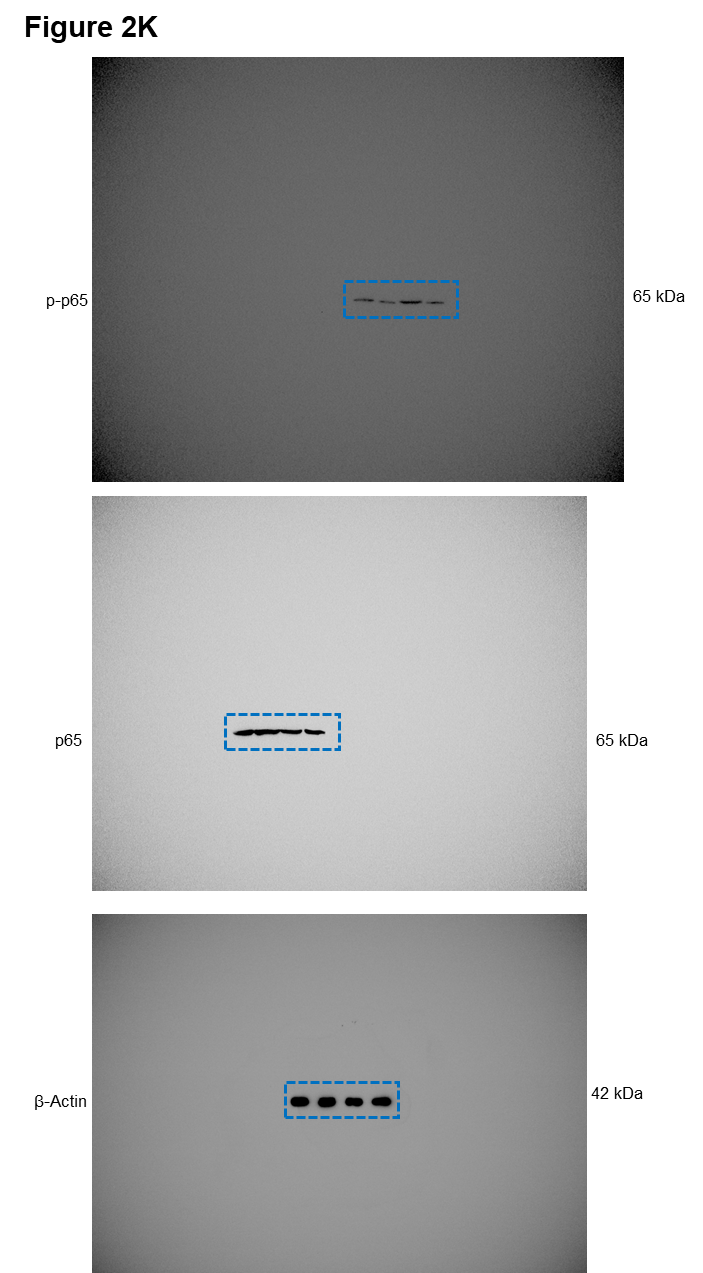


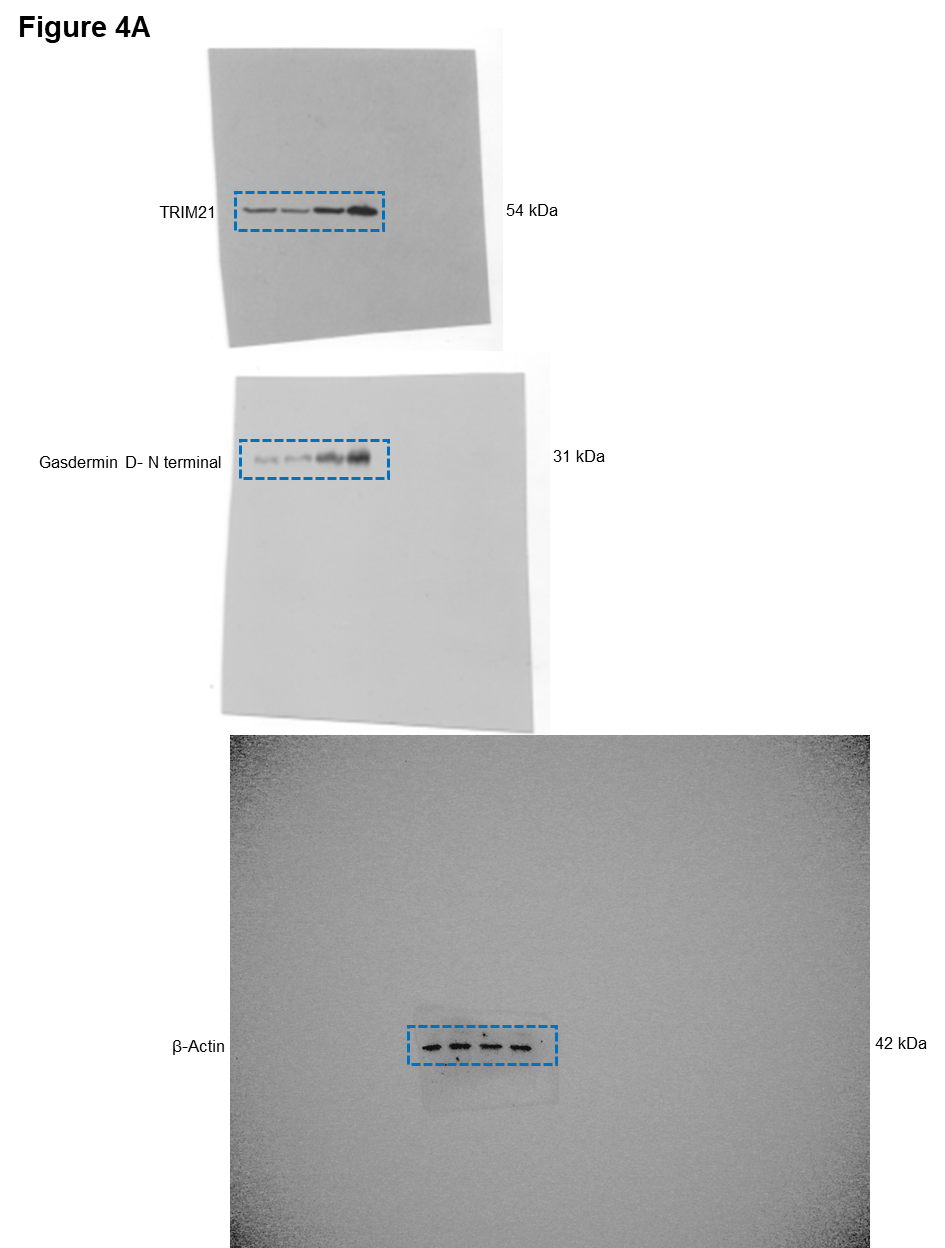


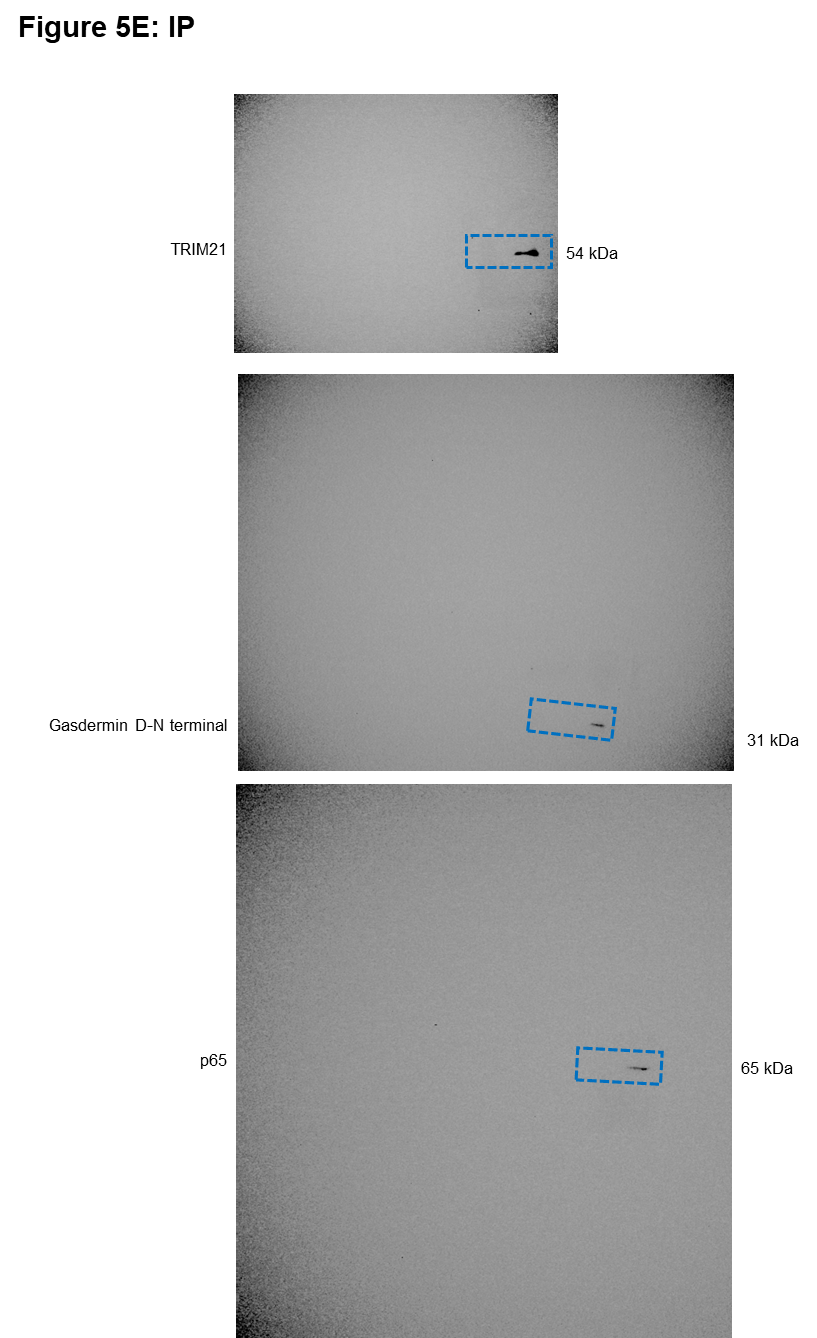


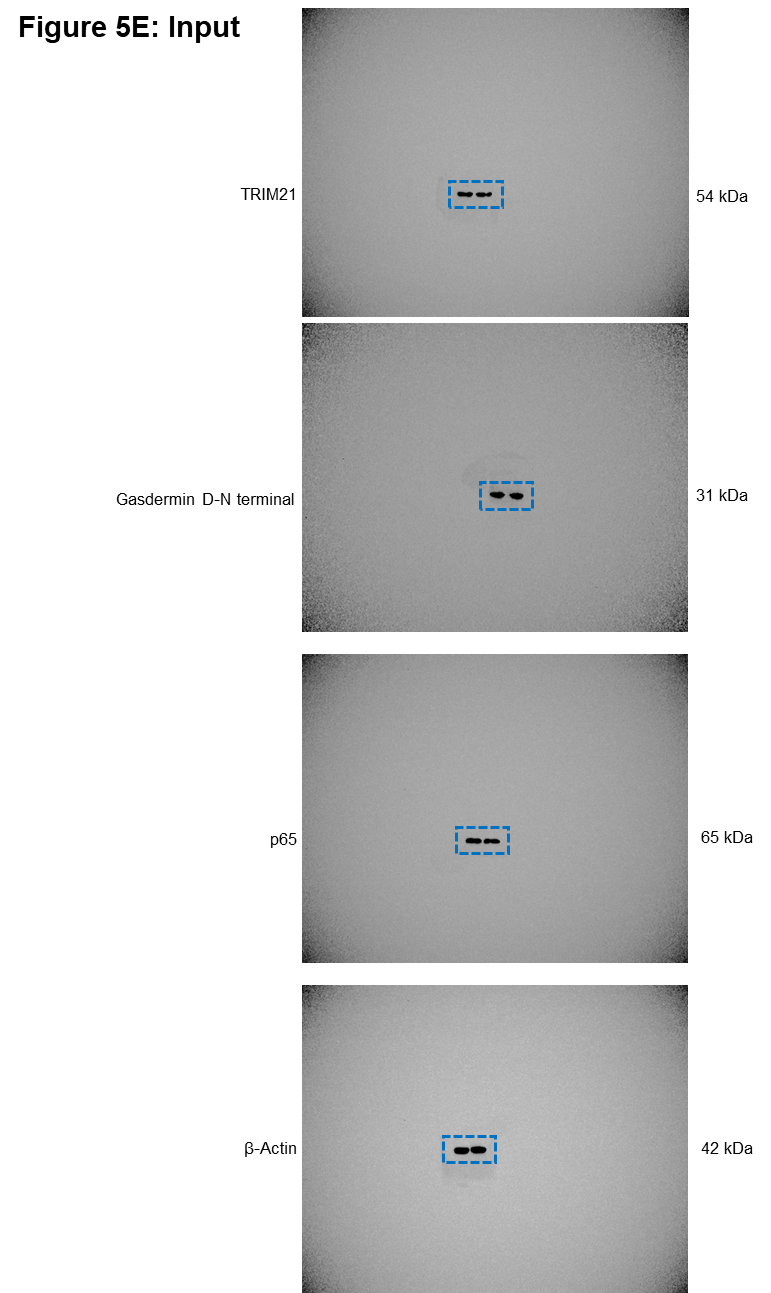


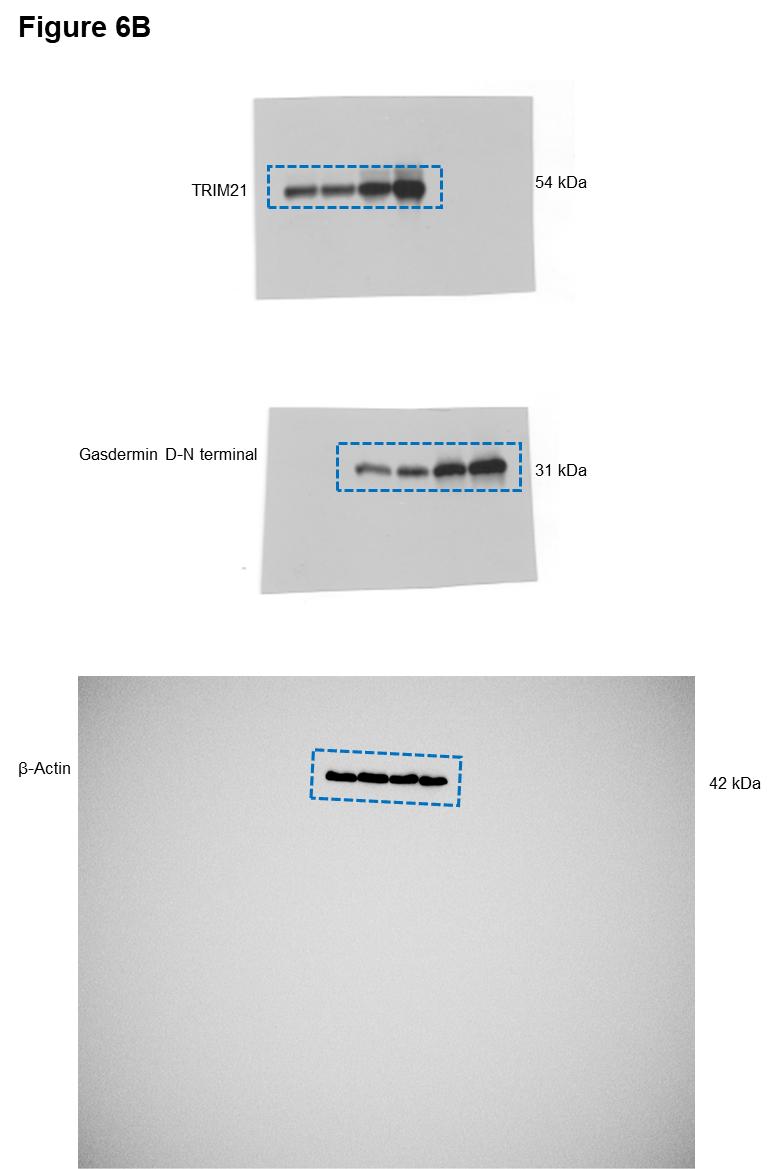


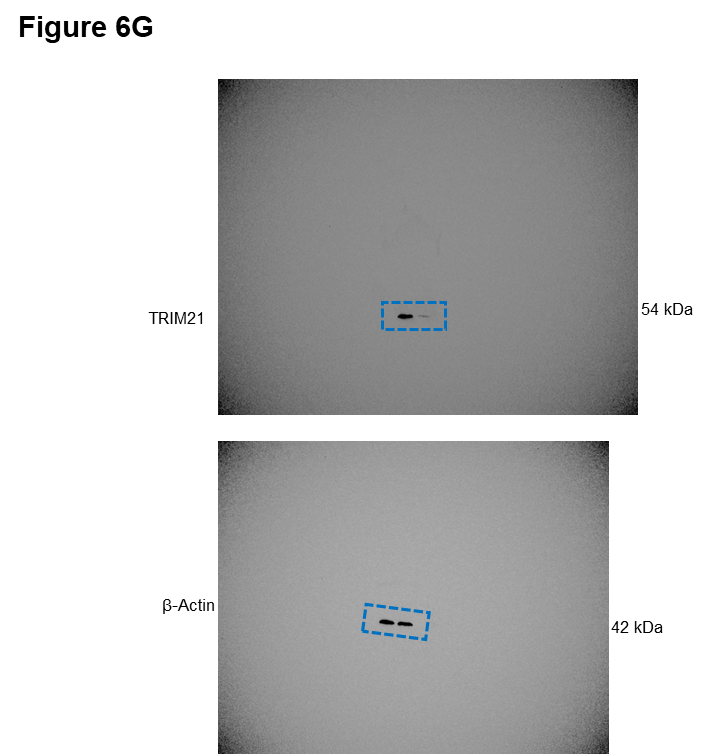


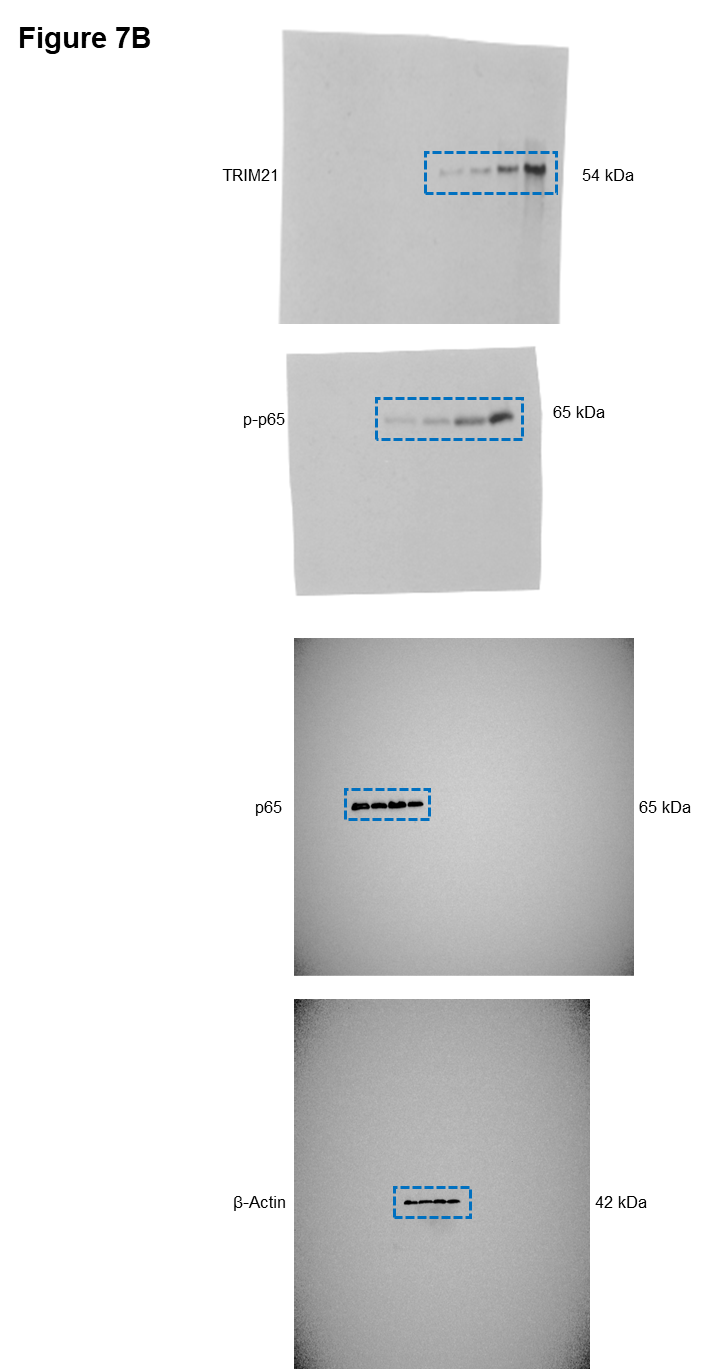


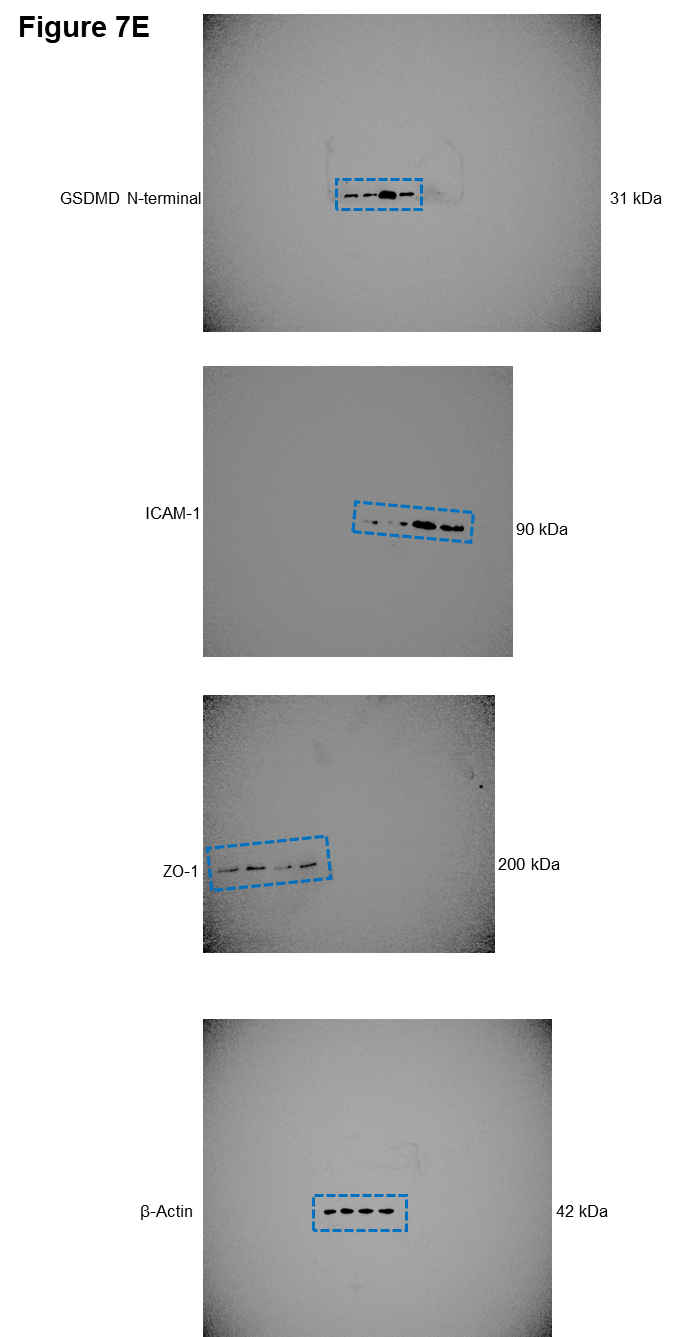


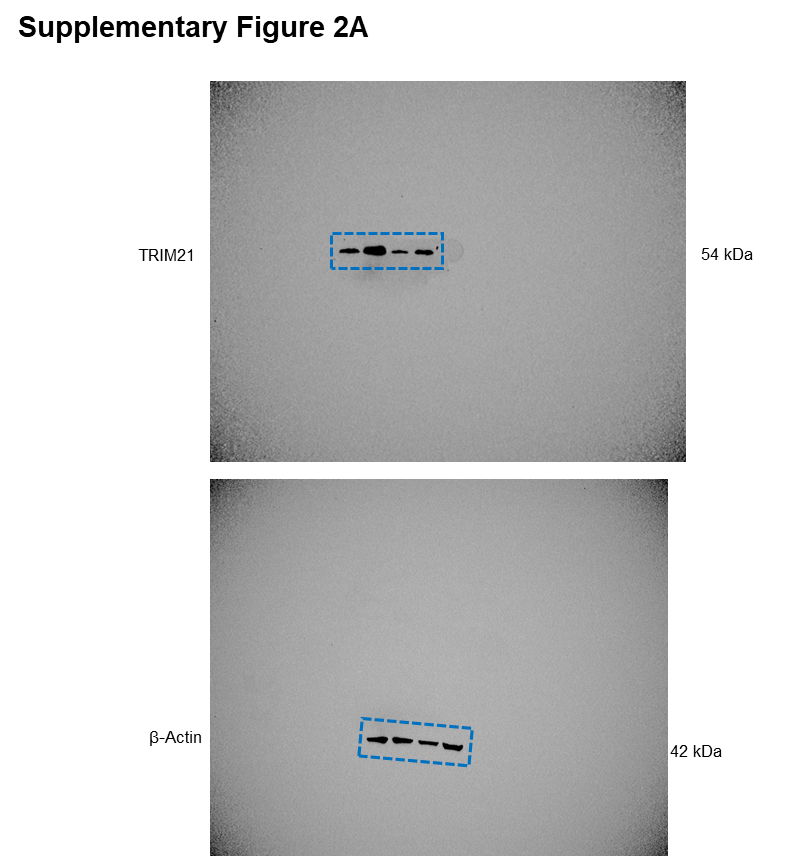

Supplement: Supplementary file 2 [file d9b86aac4937984e386e60fe.docx]
